# Supplementary material
Source: PubMed Central journal article supplement (PMC4936912)
Supplement: NIHMS730485-supplement-Supplemental_Material.pdf [file NIHMS730485-supplement-Supplemental_Material.pdf]

**The Prognostic Importance of Changes in Cardiac Structure and Function in Heart  
Failure with Preserved Ejection Fraction and the Impact of Spironolactone**

Shah: Spironolactone and Cardiac Structure and Function in HFpEF

Amil M. Shah, MD MPH; Nancy K. Sweitzer, MD; Sanjiv J. Shah, MD;  
Anita Deswal, MD, MPH; Inder S. Anand, MD, PhD; Brian Claggett, PhD;  
Jerome L. Fleg, MD; Bertram Pitt, MD; Marc A. Pfeffer, MD, PhD;  
Scott D. Solomon, MD

**SUPPLEMENTAL MATERIAL**

## Regional Analysis

The marked regional variation in TOPCAT makes interpretation of treatment effect difficult.<sup>1</sup> HF hospitalization and death rates in the Americas were consistent prior HFpEF outcomes trials, but were multifold lower in Russia and Georgia.<sup>1</sup> In addition, the significantly attenuated blood pressure, potassium, and creatinine responses to spironolactone among patients enrolled in Russia and Georgia compared to the Americas suggest that the physiologic response to randomization to spironolactone treatment differed between regions.<sup>1</sup> We therefore also performed all analyses separately by region of enrollment.

### *Impact of Spironolactone on Cardiac Structure and Function*

134 (56%) patients were enrolled in the Americas and 105 (44%) were enrolled in Russia or Georgia. Compared to patients enrolled in Russia or Georgia, those enrolled in the Americas had smaller LV volumes and higher measures of LV filling pressure (E/A ratio, E/e' ratio, LA size; Supplemental Table 2). In the Americas, the 68 patients randomized to spironolactone were well matched to the 66 patients randomized to placebo with respect to clinical and laboratory characteristics (Table 1). No significant difference was noted in the number of interval primary events between the baseline and follow-up studies between treatment arms (9 [14%] versus 4 [6%] in the placebo and spironolactone arms respectively, p=0.15). Among patients enrolled in the Americas, randomization to spironolactone compared to placebo was associated with modest decrease in LVESV (-1.4±7.7 versus 2.4±10.2 ml, p=0.024) and E/A ratio (-0.14±0.40 versus 0.11±0.62,

p=0.053) and increase in LVEF ( $1.0\pm 6.1$  versus  $-0.4\pm 7.2$ , p=0.053), but no significant difference compared to placebo in change in LV wall thickness or mass, mitral annular early relaxation velocity ( $e'$ ), E/ $e'$  ratio, or LA size (Table 2). Similar findings were noted in an on-treatment analysis, excluding 27 patients who permanently discontinued study drug prior to the follow-up echocardiogram (Supplemental Table 3). Similar findings were noted in the study population overall and in the subgroup of patients enrolled in the Americas in analysis stratified by randomization strata (prior HF hospitalization versus elevated natriuretic peptide level; Supplemental Table 4). The modest decrease in LVESV and increase in LVEF observed in the Americas appeared most prominent among patients randomized through the prior HF hospitalization stratum (Supplemental Table 4).

Among patients enrolled in Russia or Georgia, the 53 randomized to spironolactone were well matched to the 52 randomized to placebo, with the exception of a modestly lower prevalence of hypertension in the spironolactone arm (Table 1). There was no significant difference in the number of interval primary events noted between the placebo and spironolactone arms (2 [4%] vs 0 respectively, p=0.24). Among patients enrolled in Russia or Georgia, randomization to spironolactone was not associated with significant changes in cardiac structure or function (Table 2).

#### *Prognostic Relevance of Changes in Cardiac Structure and Function in HFpEF*

Participants enrolled in the Americas were followed up for a median of 625 days (IQR 357 – 898 days) after the follow-up echocardiogram. Twenty primary outcome events occurred after the follow-up echocardiogram. After adjusting for baseline values,

increase in LA volume and pulmonary artery systolic pressure (PASP) and decrease in LVEF were associated with heightened risk of subsequent occurrence of the primary endpoint, each of marginal statistical significance (Table 3; Figure 1). The association between change in PASP and the primary outcome remained marginally statistically significant after further adjustment for patient demographics, and randomization strata, while changes in LA volume and LVEF did not. Changes in E/e' ratio and measures of LV structure were not associated with subsequent outcomes. Among participants enrolled in Russia or Georgia, participants were followed-up for a median of 716 day (IQR 376 – 1008 days) after the follow-up echocardiogram, and nine primary events occurred during this time. Changes in echocardiographic measures were not associated with subsequent outcomes among patients enrolled in Russia or Georgia.

Supplemental Table 1. Clinical and echocardiographic characteristics of TOPCAT patients without versus with echocardiographic data at baseline and 12 to 18 months

|                                             | <b>No Follow-up Echo<br/>(n = 3,206)</b> | <b>Follow-up Echo<br/>(n = 239)</b> | <b>P value</b> |
|---------------------------------------------|------------------------------------------|-------------------------------------|----------------|
| Age (years)                                 | 68.5 ± 9.7                               | 70.2 ± 9.0                          | 0.007          |
| Female                                      | 52%                                      | 52%                                 | 0.80           |
| White                                       | 89%                                      | 87%                                 | 0.25           |
| Enrollment in<br>Russia/Georgia             | 49%                                      | 44%                                 | 0.13           |
| Enrollment Strata: Prior<br>Hospitalization | 72%                                      | 62%                                 | <0.001         |
| <b><i>Co-morbidities</i></b>                |                                          |                                     |                |
| Hypertension                                | 91%                                      | 93%                                 | 0.40           |
| Myocardial Infarction                       | 26%                                      | 29%                                 | 0.22           |
| Coronary<br>Revascularization               | 23%                                      | 31%                                 | 0.009          |
| Stroke                                      | 8%                                       | 10%                                 | 0.25           |
| Atrial Fibrillation                         | 35%                                      | 43%                                 | 0.009          |
| Diabetes                                    | 32%                                      | 35%                                 | 0.44           |
| Obesity                                     | 55%                                      | 56%                                 | 0.93           |
| NYHA Class                                  |                                          |                                     | 0.09*          |
| 1                                           | 3%                                       | 5%                                  |                |

|   |      |      |
|---|------|------|
| 2 | 64%  | 60%  |
| 3 | 33%  | 34%  |
| 4 | 0.4% | 0.8% |

***Physical Characteristics***

|                                    |            |            |       |
|------------------------------------|------------|------------|-------|
| BMI (kg/m <sup>2</sup> )           | 32.1 ± 7.3 | 32.4 ± 7.3 | 0.51  |
| Heart rate (bpm)                   | 68 ± 12    | 66 ± 12    | 0.01  |
| Systolic blood pressure<br>(mmHg)  | 129 ± 14   | 126 ± 14   | 0.002 |
| Diastolic blood pressure<br>(mmHg) | 76 ± 11    | 74 ± 11    | 0.001 |

***Laboratory Values***

|                                           |             |             |        |
|-------------------------------------------|-------------|-------------|--------|
| eGFR (mL/min per 1.73<br>m <sup>2</sup> ) | 67.7 ± 20.3 | 67.8 ± 18.6 | 0.94   |
| Creatinine (mg/dL)                        | 1.09 ± 0.30 | 1.08 ± 0.31 | 0.65   |
| Hematocrit (%)                            | 40.2 ± 5.1  | 39.0 ± 4.7  | <0.001 |

---

\*p-value from Fisher exact test; BMI= body mass index; eGFR= estimated glomerular filtration rate.

Supplemental Table 2. Analysis of the impact of randomization to spironolactone versus placebo among patients who did not experience permanent discontinuation of study drug prior to the follow-up echocardiogram (n=201/239 [84%])

|                                    | N   |     | Baseline    |              |      | Follow-up   |              |      | Change       |              |      |
|------------------------------------|-----|-----|-------------|--------------|------|-------------|--------------|------|--------------|--------------|------|
|                                    | Pl  | Sp  | Placebo     | Spiro        | P    | Placebo     | Spiro        | P    | Placebo      | Spiro        | P*   |
| <i>LV Structure</i>                |     |     |             |              |      |             |              |      |              |              |      |
| LVEDV (ml)                         | 86  | 88  | 95.1 ± 33.1 | 101.0 ± 30.8 | 0.22 | 98.3 ± 33.0 | 101.3 ± 34.2 | 0.56 | 3.2 ± 15.3   | 0.3 ± 14.0   | 0.19 |
| LVESV (ml)                         | 86  | 88  | 39.9 ± 22.7 | 41.4 ± 19.4  | 0.63 | 41.5 ± 24.2 | 42.0 ± 21.8  | 0.89 | 1.6 ± 9.5    | 0.6 ± 9.1    | 0.45 |
| Mean wall thickness (cm)           | 98  | 97  | 1.16 ± 0.20 | 1.12 ± 0.15  | 0.15 | 1.15 ± 0.21 | 1.11 ± 0.14  | 0.10 | -0.00 ± 0.05 | -0.01 ± 0.08 | 0.63 |
| LV mass index (mg/m <sup>2</sup> ) | 97  | 94  | 106 ± 30    | 103 ± 29     | 0.57 | 106 ± 34    | 102 ± 30     | 0.35 | 0 ± 7        | -1 ± 11      | 0.21 |
| Relative wall thickness            | 97  | 94  | 0.49 ± 0.12 | 0.47 ± 0.08  | 0.17 | 0.49 ± 0.12 | 0.47 ± 0.07  | 0.11 | -0.00 ± 0.03 | -0.00 ± 0.04 | 0.53 |
| <i>LV Function</i>                 |     |     |             |              |      |             |              |      |              |              |      |
| LVEF (%)                           | 100 | 101 | 59.1 ± 8.5  | 59.6 ± 8.1   | 0.68 | 59.1 ± 9.3  | 59.9 ± 8.1   | 0.51 | 0.0 ± 5.7    | 0.3 ± 6.2    | 0.70 |

|                                  |     |    |             |             |      |             |             |      |              |              |      |
|----------------------------------|-----|----|-------------|-------------|------|-------------|-------------|------|--------------|--------------|------|
| E/A ratio                        | 62  | 63 | 1.00 ± 0.43 | 1.05 ± 0.49 | 0.59 | 1.08 ± 0.59 | 0.93 ± 0.37 | 0.10 | 0.07 ± 0.48  | -0.12 ± 0.35 | 0.01 |
| TDI E'                           |     |    |             |             |      |             |             |      |              |              |      |
| (septal)                         | 77  | 82 | 5.76 ± 1.74 | 6.16 ± 2.05 | 0.18 | 5.63 ± 1.92 | 6.10 ± 2.12 | 0.15 | -0.12 ± 1.52 | -0.07 ± 1.81 | 0.83 |
| (cm/sec)                         |     |    |             |             |      |             |             |      |              |              |      |
| E/E' (septal)                    | 72  | 78 | 14.8 ± 4.9  | 13.8 ± 5.5  | 0.24 | 14.9 ± 5.3  | 13.6 ± 6.6  | 0.18 | 0.1 ± 4.3    | -0.2 ± 5.0   | 0.68 |
| LAV (ml)                         | 83  | 81 | 58.5 ± 19.7 | 59.0 ± 23.4 | 0.88 | 60.7 ± 21.0 | 59.6 ± 24.6 | 0.76 | 2.2 ± 12.6   | 0.6 ± 15.3   | 0.46 |
| LA diameter                      |     |    |             |             |      |             |             |      |              |              |      |
| (cm)                             | 100 | 99 | 4.08 ± 0.56 | 4.03 ± 0.51 | 0.49 | 4.11 ± 0.54 | 4.02 ± 0.48 | 0.27 | 0.02 ± 0.21  | -0.01 ± 0.19 | 0.31 |
| <i>RV and Pulmonary Vascular</i> |     |    |             |             |      |             |             |      |              |              |      |
| TR jet velocity                  |     |    |             |             |      |             |             |      |              |              |      |
| (m/sec)                          | 30  | 27 | 2.75 ± 0.48 | 2.82 ± 0.41 | 0.51 | 2.61 ± 0.41 | 2.72 ± 0.47 | 0.34 | -0.14 ± 0.55 | -0.10 ± 0.49 | 0.80 |
| RVFAC (%)                        | 60  | 53 | 0.48 ± 0.06 | 0.49 ± 0.07 | 0.65 | 0.48 ± 0.06 | 0.49 ± 0.07 | 0.25 | -0.00 ± 0.08 | 0.00 ± 0.09  | 0.58 |



Supplemental Table 3. Change in echocardiographic measures by treatment arm and by randomization strata (prior HF hospitalization or, if no prior HF hospitalization, elevated natriuretic peptide level) in the study population overall

|                                    | Prior HF Hospitalization (n=147) |           |              |            |      | Elevated Natriuretic Peptide Level (n=92) |            |              |            |      | P for inter-act |
|------------------------------------|----------------------------------|-----------|--------------|------------|------|-------------------------------------------|------------|--------------|------------|------|-----------------|
|                                    | Placebo (n=76)                   |           | Spiro (n=71) |            |      | Placebo (n=42)                            |            | Spiro (n=50) |            |      |                 |
|                                    | N                                | Mean±SD   | N            | Mean±SD    | P    | N                                         | Mean±SD    | N            | Mean±SD    | P    |                 |
| <i>LV Heart Structure</i>          |                                  |           |              |            |      |                                           |            |              |            |      |                 |
| LVEDV (ml)                         | 60                               | 3.8±13.6  | 57           | 1.44±12.8  | 0.43 | 40                                        | 2.7±16.5   | 44           | -0.7±15.5  | 0.39 | 0.85            |
| LVESV (ml)                         | 60                               | 3.6±8.6   | 57           | 0.4±8.5    | 0.05 | 40                                        | -0.2±9.6   | 44           | 0.6±8.9    | 0.68 | 0.12            |
| Mean wall thickness (cm)           | 74                               | 0.00±0.05 | 68           | -0.01±0.08 | 0.21 | 41                                        | -0.01±0.05 | 49           | -0.01±0.07 | 0.91 | 0.48            |
| LV mass index (mg/m <sup>2</sup> ) | 73                               | 1±7       | 65           | -1±14      | 0.19 | 41                                        | -1±6.8     | 48           | -1±11      | 0.75 | 0.53            |
| Relative wall thickness            | 73                               | 0.00±0.03 | 65           | -0.01±0.04 | 0.19 | 41                                        | 0.00±0.04  | 48           | -0.00±0.04 | 0.66 | 0.71            |
| LAV (ml)                           | 61                               | 1.3±11.1  | 53           | 2.7±14.0   | 0.56 | 36                                        | 3.8±13.5   | 40           | -1.1±16.8  | 0.19 | 0.14            |
| LA diameter                        | 75                               | 0.03±0.22 | 69           | 0.01±0.19  | 0.70 | 42                                        | 0.02±2.0   | 50           | -0.04±0.20 | 0.11 | 0.35            |

(cm)

*LV Function*

|                             |    |            |    |            |      |    |            |    |            |      |      |
|-----------------------------|----|------------|----|------------|------|----|------------|----|------------|------|------|
| LVEF (%)                    | 76 | -1.4±6.5   | 71 | 0.4±6.7    | 0.11 | 42 | 1.2±5.6    | 50 | -0.2±5.2   | 0.32 | 0.10 |
| E/A ratio                   | 49 | 0.06±0.49  | 45 | -0.03±0.34 | 0.26 | 24 | 0.04±0.39  | 26 | -0.20±0.37 | 0.05 | 0.45 |
| TDI E' (septal)<br>(cm/sec) | 63 | -0.27±1.65 | 62 | -0.08±1.68 | 0.25 | 28 | -0.09±1.43 | 33 | -0.15±2.01 | 0.96 | 0.51 |
| E/E' (septal)               | 58 | 0.5±4.1    | 59 | 0.5±4.8    | 0.73 | 28 | 0.4±5.5    | 32 | 0.0±5.8    | 0.76 | 0.86 |

*RV and Pulmonary Vascular*

|                            |    |            |    |           |      |    |            |    |            |      |      |
|----------------------------|----|------------|----|-----------|------|----|------------|----|------------|------|------|
| TR jet velocity<br>(m/sec) | 18 | -0.08±0.53 | 20 | 0.11±0.48 | 0.40 | 18 | -0.05±0.58 | 17 | -0.16±0.50 | 0.62 | 0.79 |
| RVFAC (%)                  | 43 | -0.00±0.09 | 32 | 0.01±0.07 | 0.34 | 28 | 0.00±0.08  | 34 | -0.00±0.10 | 0.85 | 0.51 |

---

Table 4. Baseline characteristics by randomization treatment arm in the study population overall and stratified by region of enrollment

|                                          | Americas       |              |         | Russia/Georgia |              |         |
|------------------------------------------|----------------|--------------|---------|----------------|--------------|---------|
|                                          | Placebo (n=66) | Spiro (n=68) | P value | Placebo (n=52) | Spiro (n=53) | P value |
| Age (years)                              | 72.2 ± 8.6     | 70.6 ± 10.0  | 0.32    | 68.9 ± 7.8     | 68.6 ± 8.8   | 0.83    |
| Female                                   | 47%            | 49%          | 0.86    | 62%            | 55%          | 0.48    |
| White                                    | 80%            | 72%          | 0.26    | 100%           | 100%         | -       |
| Enrollment Strata: Prior Hospitalization | 52%            | 49%          | 0.73    | 81%            | 72%          | 0.28    |
| <b><i>Co-morbidities</i></b>             |                |              |         |                |              |         |
| Hypertension                             | 94%            | 90%          | 0.53*   | 100%           | 89%          | 0.03*   |
| Myocardial Infarction                    | 14%            | 18%          | 0.52    | 44%            | 49%          | 0.62    |
| Coronary Revascularization               | 27%            | 31%          | 0.65    | 33%            | 32%          | 0.95    |
| Stroke                                   | 5%             | 9%           | 0.32    | 10%            | 17%          | 0.27    |
| Atrial Fibrillation                      | 55%            | 52%          | 0.72    | 31%            | 30%          | 0.95    |

|                                        |             |             |       |             |             |       |
|----------------------------------------|-------------|-------------|-------|-------------|-------------|-------|
| Diabetes                               | 50%         | 46%         | 0.61  | 14%         | 23%         | 0.22  |
| Obesity                                | 67%         | 71%         | 0.62  | 37%         | 42%         | 0.60  |
| NYHA Functional Class                  |             |             | 0.60* |             |             | 0.68* |
| 1                                      | 9%          | 6%          |       | 2%          | 4%          |       |
| 2                                      | 59%         | 68%         |       | 58%         | 53%         |       |
| 3                                      | 32%         | 27%         |       | 40%         | 40%         |       |
| 4                                      | 0%          | 0%          |       | 0%          | 4%          |       |
| <b><i>Physical Characteristics</i></b> |             |             |       |             |             |       |
| BMI (kg/m <sup>2</sup> )               | 34.1 ± 8.8  | 35.0 ± 8.4  | 0.56  | 29.4 ± 4.0  | 30.0 ± 4.0  | 0.43  |
| Heart rate (bpm)                       | 69 ± 12     | 65 ± 12     | 0.09  | 66 ± 11     | 64 ± 11     | 0.29  |
| Systolic blood pressure (mmHg)         | 123 ± 14    | 124 ± 15    | 0.75  | 130 ± 12    | 131 ± 12    | 0.61  |
| Diastolic blood pressure (mmHg)        | 69 ± 12     | 71 ± 10     | 0.50  | 78 ± 7      | 78 ± 8      | 0.78  |
| <b><i>Laboratory Values</i></b>        |             |             |       |             |             |       |
| eGFR (mL/min per 1.73 m <sup>2</sup> ) | 63.2 ± 18.5 | 64.4 ± 21.2 | 0.71  | 73.2 ± 16.1 | 72.4 ± 15.0 | 0.80  |

|                    |             |             |      |             |             |      |
|--------------------|-------------|-------------|------|-------------|-------------|------|
| Creatinine (mg/dL) | 1.17 ± 0.33 | 1.19 ± 0.36 | 0.71 | 0.95 ± 0.18 | 0.97 ± 0.21 | 0.46 |
| Hematocrit (%)     | 37.8 ± 4.7  | 38.4 ± 4.0  | 0.46 | 39.5 ± 4.9  | 40.8 ± 5.0  | 0.20 |

\*P value from Fisher exact test; BMI=body mass index; eGFR= estimated glomerular filtration rate

Supplemental Table 5. Baseline echocardiographic measures by region. Adjusted P value adjusts for age, randomization strata, prior MI, diabetes, BMI, and eGFR

|                                   | <b>Americas</b><br><b>(n=134)</b> | <b>Russia/Georgia</b><br><b>(n=105)</b> | <b>Unadjusted P</b> | <b>Adjusted P</b> |
|-----------------------------------|-----------------------------------|-----------------------------------------|---------------------|-------------------|
| LVEDV (ml)                        | 90.6 ± 28.1                       | 106.7 ± 36.4                            | <0.001              | 0.007             |
| LVESV (ml)                        | 36.9 ± 15.9                       | 46.1 ± 25.0                             | <0.001              | 0.054             |
| Mean WT (cm)                      | 1.18 ± 0.20                       | 1.13 ± 0.17                             | 0.046               | 0.12              |
| LV mass index (g/m <sup>2</sup> ) | 104 ± 30                          | 108 ± 28                                | 0.25                | 0.93              |
| RWT                               | 0.51 ± 0.11                       | 0.47 ± 0.10                             | 0.004               | 0.065             |
| LVEF (%)                          | 60.1 ± 7.8                        | 58.7 ± 8.3                              | 0.21                | 0.91              |
| E/A ratio                         | 1.30 ± 0.63                       | 0.88 ± 0.36                             | <0.001              | <0.001            |
| TDI e'                            | 6.34 ± 2.09                       | 5.32 ± 1.40                             | <0.001              | 0.003             |
| E/e' ratio                        | 16.3 ± 6.5                        | 13.5 ± 5.2                              | <0.001              | 0.032             |
| LA volume (ml)                    | 65.5 ± 24.2                       | 54.6 ± 20.3                             | <0.001              | 0.033             |

|                  |             |             |       |      |
|------------------|-------------|-------------|-------|------|
| LA diameter (cm) | 4.15 ± 0.54 | 4.00 ± 0.53 | 0.028 | 0.25 |
| PASP (mmHg)      | 41 ± 9      | 38 ± 9      | 0.031 | 0.79 |
| RVFAC (%)        | 48.8 ± 7.4  | 48.5 ± 5.9  | 0.71  | 0.99 |

---

LVEDV – left ventricular end diastolic volume, LVESV – left ventricular end-systolic volume, LVEF – left ventricular ejection fraction; TDI E' – tissue Doppler early diastolic relaxation velocity; LAV – left atrial volume; TR – tricuspid regurgitation; RVFAC – right ventricular fractional area change

Supplemental Table 6. Baseline, Follow-up, and Change in echocardiographic measures by treatment arm separately among patients enrolled in the Americas and in Russia/Georgia. \*P value for between treatment group differences in change is based on linear regression models adjusting for the baseline value

|                                           | N       |       | Baseline    |             | p    | Follow-up   |             | p    | Change       |              | P*    |
|-------------------------------------------|---------|-------|-------------|-------------|------|-------------|-------------|------|--------------|--------------|-------|
|                                           | Placebo | Spiro | Placebo     | Spiro       |      | Placebo     | Spiro       |      | Placebo      | Spiro        |       |
| <b>Enrollment in the Americas (n=134)</b> |         |       |             |             |      |             |             |      |              |              |       |
| <i>Left Heart Structure</i>               |         |       |             |             |      |             |             |      |              |              |       |
| LVEDV (ml)                                | 57      | 54    | 86.8 ± 23.4 | 90.2 ± 28.7 | 0.48 | 91.0 ± 28.7 | 89.1 ± 28.7 | 0.73 | 4.3 ± 16.2   | -1.0 ± 13.5  | 0.073 |
| LVESV (ml)                                | 57      | 54    | 35.7 ± 14.7 | 34.6 ± 13.9 | 0.66 | 38.1 ± 18.0 | 33.1 ± 13.1 | 0.10 | 2.4 ± 10.2   | -1.4 ± 7.7   | 0.024 |
| Mean wall thickness (cm)                  | 65      | 64    | 1.19 ± 0.22 | 1.16 ± 0.16 | 0.37 | 1.19 ± 0.22 | 1.14 ± 0.16 | 0.22 | -0.00 ± 0.05 | -0.01 ± 0.08 | 0.25  |
| LV mass index (mg/m <sup>2</sup> )        | 64      | 61    | 106 ± 31    | 103 ± 28    | 0.57 | 106 ± 31    | 101 ± 30    | 0.37 | 0 ± 7        | -2 ± 13      | 0.27  |
| Relative wall thickness                   | 64      | 61    | 0.51 ± 0.13 | 0.50 ± 0.08 | 0.40 | 0.52 ± 0.13 | 0.49 ± 0.08 | 0.23 | 0.00 ± 0.04  | 0.00 ± 0.04  | 0.24  |
| LAV (ml)                                  | 51      | 51    | 64.5 ± 21.3 | 63.9 ± 25.9 | 0.90 | 66.9 ± 23.4 | 62.8 ± 26.9 | 0.41 | 2.4 ± 13.8   | -1.1 ± 15.7  | 0.21  |
| LA diameter (cm)                          | 66      | 66    | 4.21 ± 0.55 | 4.12 ± 0.53 | 0.31 | 4.23 ± 0.56 | 4.11 ± 0.50 | 0.20 | 0.02 ± 0.23  | -0.01 ± 0.18 | 0.37  |
| <i>LV Function</i>                        |         |       |             |             |      |             |             |      |              |              |       |



|                                  |    |    |             |             |      |             |             |      |              |              |       |
|----------------------------------|----|----|-------------|-------------|------|-------------|-------------|------|--------------|--------------|-------|
| LVEF (%)                         | 66 | 68 | 59.0 ± 8.3  | 61.1 ± 7.3  | 0.11 | 58.6 ± 9.6  | 62.1 ± 6.3  | 0.01 | -0.4 ± 7.2   | 1.0 ± 6.1    | 0.053 |
| E/A ratio                        | 35 | 38 | 1.16 ± 0.52 | 1.24 ± 0.54 | 0.53 | 1.27 ± 0.69 | 1.09 ± 0.45 | 0.20 | 0.11 ± 0.62  | -0.14 ± 0.40 | 0.052 |
| TDI E' (septal)<br>(cm/sec)      | 46 | 52 | 6.20 ± 1.92 | 6.62 ± 2.26 | 0.33 | 5.79 ± 2.04 | 6.44 ± 2.16 | 0.13 | -0.41 ± 1.79 | -0.18 ± 1.97 | 0.24  |
| E/E' (septal)                    | 46 | 52 | 16.4 ± 5.5  | 15.5 ± 6.3  | 0.48 | 17.1 ± 6.1  | 15.7 ± 8.5  | 0.35 | 0.8 ± 5.6    | 0.2 ± 6.1    | 0.53  |
| <i>RV and Pulmonary Vascular</i> |    |    |             |             |      |             |             |      |              |              |       |
| TR jet velocity<br>(m/sec)       | 28 | 27 | 2.76 ± 0.45 | 2.88 ± 0.38 | 0.26 | 2.71 ± 0.50 | 2.78 ± 0.43 | 0.57 | -0.05 ± 0.57 | -0.11 ± 0.46 | 0.82  |
| RVFAC (%)                        | 44 | 38 | 0.48 ± 0.08 | 0.50 ± 0.07 | 0.22 | 0.49 ± 0.06 | 0.50 ± 0.07 | 0.65 | 0.02 ± 0.08  | 0.00 ± 0.09  | 0.90  |

---

**Enrollment in Russia or Georgia (n=105)**

*Left Heart Structure*

|                                       |    |    |              |              |      |              |              |      |              |              |      |
|---------------------------------------|----|----|--------------|--------------|------|--------------|--------------|------|--------------|--------------|------|
| LVEDV (ml)                            | 43 | 47 | 101.3 ± 39.7 | 109.7 ± 32.9 | 0.27 | 103.3 ± 35.7 | 112.0 ± 35.1 | 0.25 | 2.1 ± 12.7   | 2.3 ± 14.5   | 0.73 |
| LVESV (ml)                            | 43 | 47 | 42.9 ± 28.0  | 47.4 ± 22.2  | 0.40 | 44.5 ± 28.3  | 50.1 ± 25.2  | 0.32 | 1.7 ± 7.6    | 2.8 ± 9.2    | 0.56 |
| Mean wall<br>thickness (cm)           | 50 | 53 | 1.13 ± 0.16  | 1.13 ± 0.18  | 0.94 | 1.13 ± 0.16  | 1.13 ± 0.18  | 0.95 | 0.00 ± 0.05  | -0.00 ± 0.08 | 0.73 |
| LV mass index<br>(mg/m <sup>2</sup> ) | 50 | 52 | 107 ± 26     | 110 ± 30     | 0.61 | 108 ± 25     | 109 ± 32     | 0.83 | 1 ± 7        | -1 ± 12      | 0.46 |
| Relative wall                         | 50 | 52 | 0.47 ± 0.10  | 0.46 ± 0.10  | 0.67 | 0.47 ± 0.10  | 0.46 ± 0.10  | 0.57 | -0.00 ± 0.02 | -0.00 ± 0.04 | 0.63 |

|                                  |    |    |             |             |      |             |             |      |              |              |      |
|----------------------------------|----|----|-------------|-------------|------|-------------|-------------|------|--------------|--------------|------|
| thickness                        |    |    |             |             |      |             |             |      |              |              |      |
| LAV (ml)                         | 46 | 42 | 51.0 ± 16.8 | 53.7 ± 16.2 | 0.45 | 53.0 ± 15.4 | 57.4 ± 21.5 | 0.27 | 2.0 ± 10.0   | 3.7 ± 14.5   | 0.41 |
| LA diameter (cm)                 | 51 | 53 | 3.92 ± 0.52 | 4.08 ± 0.53 | 0.13 | 3.95 ± 0.51 | 4.06 ± 0.51 | 0.28 | 0.03 ± 0.18  | -0.01 ± 0.20 | 0.37 |
| <i>LV Function</i>               |    |    |             |             |      |             |             |      |              |              |      |
| LVEF (%)                         | 52 | 53 | 59.4 ± 8.4  | 58.1 ± 8.2  | 0.41 | 58.8 ± 9.3  | 57.1 ± 9.1  | 0.34 | -0.6 ± 5.0   | -1.0 ± 6.0   | 0.64 |
| E/A ratio                        | 38 | 33 | 0.84 ± 0.24 | 0.82 ± 0.28 | 0.77 | 0.84 ± 0.27 | 0.79 ± 0.28 | 0.41 | 0.01 ± 0.24  | -0.03 ± 0.30 | 0.44 |
| TDI E' (septal)<br>(cm/sec)      | 45 | 43 | 5.30 ± 1.39 | 5.48 ± 1.49 | 0.55 | 5.29 ± 1.67 | 5.47 ± 1.83 | 0.64 | -0.01 ± 1.33 | -0.01 ± 1.56 | 0.89 |
| E/E' (septal)                    | 40 | 39 | 13.4 ± 4.3  | 12.2 ± 3.5  | 0.16 | 13.6 ± 4.2  | 12.8 ± 4.3  | 0.38 | 0.2 ± 3.0    | 0.6 ± 3.7    | 0.94 |
| <i>RV and Pulmonary Vascular</i> |    |    |             |             |      |             |             |      |              |              |      |
| TR jet velocity<br>(m/sec)       | 8  | 10 | 2.64 ± 0.52 | 2.55 ± 0.32 | 0.65 | 2.51 ± 0.32 | 2.77 ± 0.56 | 0.26 | -0.12 ± 0.49 | 0.22 ± 0.55  | 0.21 |
| RVFAC (%)                        | 27 | 28 | 0.49 ± 0.05 | 0.49 ± 0.08 | 1.00 | 0.46 ± 0.06 | 0.48 ± 0.06 | 0.24 | -0.02 ± 0.08 | -0.00 ± 0.07 | 0.22 |

---

LVEDV – left ventricular end diastolic volume, LVESV – left ventricular end-systolic volume, LVEF – left ventricular ejection fraction; TDI E' – tissue Doppler early diastolic relaxation velocity; LAV – left atrial volume; TR – tricuspid regurgitation; RVFAC – right ventricular fractional area change

Supplemental Table 7. Change in echocardiographic measures of cardiac structure and function and subsequent outcomes stratified by region of enrollment. Fully adjusted analysis adjusts for baseline value, age, gender, race, randomization strata, and region of enrollment (for analysis of overall study population). After multivariable adjustment: \*HR 0.93 (0.85-1.00), p=0.06; §HR 1.03 (1.00-1.06), p=0.09; ¥HR 1.12 (1.03-1.23), p=0.01

| Measure                       | Enrolled in the Americas |        |                      |         | Enrolled in Russia or Georgia |        |                      |         |
|-------------------------------|--------------------------|--------|----------------------|---------|-------------------------------|--------|----------------------|---------|
|                               | N                        | Events | Baseline-adjusted HR | P value | N                             | Events | Baseline-adjusted HR | P value |
| ΔLVEDV (per ml)               | 99                       | 16     | 1.02 (0.99-1.05)     | 0.29    | 87                            | 7      | 0.98 (0.93-1.03)     | 0.43    |
| ΔLVESV (per ml)               | 99                       | 16     | 1.03 (0.98-1.08)     | 0.30    | 87                            | 7      | 0.98 (0.91-1.05)     | 0.59    |
| ΔLVMI (per g/m <sup>2</sup> ) | 109                      | 20     | 1.00 (0.96-1.05)     | 0.84    | 99                            | 9      | 1.00 (0.94-1.06)     | 0.96    |
| ΔLVEF (per 1%)                | 117                      | 20     | 0.92 (0.85-0.99)     | 0.03*   | 102                           | 9      | 1.09 (0.97-1.23)     | 0.16    |
| ΔE/A ratio (per 0.1 unit)     | 66                       | 9      | 1.08 (0.98-1.19)     | 0.11    | 69                            | 6      | 0.92 (0.67-1.25)     | 0.59    |
| Δe' (per cm/s)                | 86                       | 15     | 1.03 (0.77-1.39)     | 0.84    | 85                            | 7      | 1.10 (0.61-2.02)     | 0.74    |
| ΔE/e' ratio (per 1 unit)      | 86                       | 15     | 0.98 (0.91-1.07)     | 0.72    | 77                            | 7      | 0.75 (0.56-1.00)     | 0.05    |
| ΔLAV (per ml)                 | 91                       | 16     | 1.03 (1.00 – 1.07)   | 0.04§   | 85                            | 8      | 1.05 (0.99-1.12)     | 0.10    |
| ΔPASP (per mmHg)              | 47                       | 7      | 1.08 (1.01-1.16)     | 0.02¥   | 18                            | 1      | 0.92 (0.63-1.33)     | 0.65    |
| ΔRVFAC (per 1%)               | 70                       | 7      | 0.92 (0.81-1.05)     | 0.24    | 54                            | 5      | 0.89 (0.75-1.04)     | 0.14    |

Supplemental Table 8. Studies of the impact of aldosterone antagonist therapy on cardiac structure and function in HFpEF and TOPCAT Echo among patients enrolled in the Americas, comparing magnitude of observed effect on LVESV, E/A ratio, and LVEF

| Author (year)                       | N   | Endpoints                                                                       | Observed between group change in                                                   |                                                                                    |                                                                                |
|-------------------------------------|-----|---------------------------------------------------------------------------------|------------------------------------------------------------------------------------|------------------------------------------------------------------------------------|--------------------------------------------------------------------------------|
|                                     |     |                                                                                 | LVESV                                                                              | E/A ratio                                                                          | LVEF                                                                           |
| Daniel et al 2009 <sup>2</sup>      | 11  | ↓E/e'<br>No change in E/A ratio, e', LV dimension or WT                         | 24±7 to 26±6<br>p=0.57                                                             | 0.95±0.53 to 0.71±0.16<br>p=0.52                                                   | NR                                                                             |
| Mak et al 2009 <sup>3</sup>         | 44  | ↓DT<br>No change in E/A ratio, e', E/e', LAVi, LVMi                             | NR                                                                                 | 0.80±0.31 to 0.83±0.57<br>vs<br>0.89±0.38 to 0.95±0.39<br>btw grp p = NS           | 64±9.6 to 67±11.3<br>vs<br>63±9.0 to 67±7.9<br>btw grp p = NS                  |
| Deswal et al 2011 <sup>4</sup>      | 44  | ↓E/e'<br>No change in E/A ratio, e', LAV, LV dimension, LVMi                    | NR                                                                                 | 1.22±0.66 to 1.11±0.47<br>vs<br>1.41±0.98 to 1.23±0.72<br>btw grp p = NS           | NR                                                                             |
| Kurrelmeyer et al 2014 <sup>5</sup> | 48  | ↓E/e', ↓e', ↓LV mass<br>No change in E/A ratio, LAV, LV dimension               | NR                                                                                 | NR                                                                                 | NR                                                                             |
| ALDO-DHF 2013 <sup>6</sup>          | 422 | ↓E/e', ↓e', ↓LVMi, ↓LV dimension, ↑LVEF<br>No change in E/A ratio, LAV          | NR                                                                                 | 0.92±0.34 to 0.96<br>vs<br>0.90±0.31 to 0.91<br>btw grp p = 0.08                   | 68±7 to 65.9<br>vs<br>67±8 to 67.2<br>btw grp p = 0.04                         |
| TOPCAT Echo (Americas only)         | 134 | ↓LVESV, marginal ↓E/A ratio, marginal ↑LVEF<br>No change in e', E/e', LAV, LVMi | 35.7 ± 14.7 to 38.1 ± 18.0<br>vs<br>34.6 ± 13.9 to 33.1 ± 13.1<br>btw grp p = 0.02 | 1.16 ± 0.52 to 1.27 ± 0.69<br>vs<br>1.24 ± 0.54 to 1.09 ± 0.45<br>btw grp p = 0.05 | 59.0 ± 8.3 to 58.6 ± 9.6<br>vs<br>61.1 ± 7.3 to 62.1 ± 6.3<br>btw grp p = 0.05 |

Values are listed as baseline to follow-up with placebo on top line and active therapy on the bottom line; NR – not reported

## Supplemental Reference

1. Pfeffer MA, Claggett B, Assmann SF, Boineau R, Anand IS, Clausell N, Desai AS, Diaz R, Fleg JL, Gordeev I, Heitner J, Lewis EF, O'Meara E, Rouleau JL, Probstfield JL, Shaburishvili T, Shah SJ, Solomon SD, Sweitzer N, McKinlay S, Pitt B. Regional variation in patients and outcomes in the Treatment of Preserved Cardiac Function Heart Failure with an Aldosterone Antagonist (TOPCAT) trial. *Circulation* 2015;131:34-42.
2. Daniel KR, Wells G, Stewart K, Moore B, Kitzman DW. Effect of aldosterone antagonism on exercise tolerance, Doppler diastolic function, and quality of life in older women with diastolic heart failure. *Congest Heart Fail* 2009;15:68-74.
3. Mak GJ, Ledwidge MT, Watson CJ, Phelan DM, Dawkins IR, Murphy NF, Patle AK, Baugh JA, McDonald KM. Natural history of markers of collagen turnover in patients with early diastolic dysfunction and impact of eplerenone. *J Am Coll Cardiol* 2009;54:1674-82.
4. Deswal A, Richardson P, Bozkurt B, Mann DL. Results of the Randomized Aldosterone Antagonism in heart failure with Preserved Ejection Fraction trial (RAAMP-PEF). *J Cardiac Fail* 2011;17:634-42.
5. Kurrelmeyer KM, Ashton Y, Xu J, Nagueh SF, Torre-Amione G, Deswal A. Effects of spironolactone treatment in elderly women with heart failure and preserved left ventricular ejection fraction. *J Cardiac Fail* 2014;20:560-8.
6. Edelmann F, Wachter R, Schmidt AG, Kraigher-Krainer E, Colantonio C, Kamke W, Duvinage A, Stahrenberg R, Durstewitz K, Loffler M, Dungen HD, Tschope C, Herrmann-Lingen C, Halle M, Hasenfuss G, Gelbrich G, Pieske B. Effect of spironolactone on diastolic function and exercise capacity in patients with heart failure with preserved ejection fraction: The ALDO-DHF randomized controlled trial. *JAMA* 2013;209:781-91.
